# Supplementary material for: Synthesis and self-assembly of branched glycopolypeptides: effect of topology and conformation
Source: Royal Society of Chemistry journal article supplement (doi:10.1039/c3fd00082f), 2013-01-01
Supplement: c3fd00082f.pdf [file c3fd00082f.pdf]

## Supporting Information for

# Synthesis and self-assembly of branched glycopolypeptides: effect of topology and conformation

Colin Bonduelle,<sup>a</sup> Silvia Mazzaferro,<sup>a</sup> Jin Huang,<sup>b</sup> Olivier Lambert,<sup>c</sup> Andreas Heise,<sup>b</sup>  
Sébastien Lecommandoux<sup>a,\*</sup>

<sup>a</sup> Université de Bordeaux/IPB, ENSCBP, 16 avenue Pey Berland, 33607 Pessac Cedex, France. CNRS, Laboratoire de Chimie des Polymères Organiques (UMR5629), Pessac, France.

<sup>b</sup> School of Chemical Sciences, Dublin City University, Dublin 9, Ireland.

<sup>c</sup> Univ. Bordeaux, CBMN UMR 5248, IPB, IECB, F-33600 Pessac, France.  
CNRS, CBMN UMR5248, F-33600 Pessac, France

email: [lecommandoux@enscbp.fr](mailto:lecommandoux@enscbp.fr)

### **Synthesis of glycopolypeptide 2':**

Tree-like 2', 40 units of benzyl-*L*-glutamate: poly( $\gamma$ -benzyl-*L*-glutamate-*block*-*DL*-propargylglycine, copolymer 2) (93 mg, ca. 0.045 mmol of alkyne units),  $\alpha$ -azido-dextran (600 mg, 0.09 mmol, 2 equiv. to alkyne groups) and sodium ascorbate (63 mg, 0.32 mmol, 7 equiv. to alkyne groups) were dissolved in 5 mL of anhydrous DMSO in a Schlenk tube. CuSO<sub>4</sub> (45 mg, 0.18 mmol, 4 equiv. to alkynes groups) was then added and the Schlenk tube was placed in an oil bath at 30 °C for 16 hours. The reaction medium was then dialyzed 4-5 days against milliQ water (Spectra/Por®6 MWCO 50 kDa membrane), containing EDTA the first 2 days, and lyophilized, then the reaction mixture was purified by ultrafiltration to remove all the unreacted dextran (yield = 349 mg, 89%).

<sup>1</sup>H-NMR (400 MHz, DMSO,  $\delta$ , ppm): 7.26 (s broad, benzyl), 5.05 (s broad, CH<sub>2</sub>-benzyl), 4.92 (s broad, C<sub>4</sub>OH), 4.84 (s broad, C<sub>3</sub>OH), 4.70 (s broad, C<sub>1</sub>H<sub>anom.</sub>), 4.55 (s, broad, NH-CH-CO), 4.49 (s broad, C<sub>2</sub>OH), 3.76 (s broad, C<sub>6</sub>H), 3.53 (s broad, C<sub>5</sub>H), 3.45 (s broad, C<sub>6</sub>H'), 3.22 (s broad, C<sub>2</sub>H + C<sub>4</sub>H), 2.55 (s broad, CH<sub>2</sub>-CH<sub>2</sub>-CO), 2-2.2 (m broad, CH-CH<sub>2</sub>-CH<sub>2</sub>). IR (cm<sup>-1</sup>): 3100-3600 (peak: 3300); 2920; 1730, 1650, 1545, 1200-1450 (multiple peaks)

### **Synthesis of glycopolypeptide 3':**

Tree-like 3', 60 units of benzyl-*L*-glutamate: poly( $\gamma$ -benzyl-*L*-glutamate-*block*-*DL*-propargylglycine, copolymer 3) (137 mg, ca. 0.045 mmol of alkyne units),  $\alpha$ -azido-dextran (600 mg, 0.09 mmol, 2 equiv. to alkyne groups) and sodium ascorbate (63 mg, 0.32 mmol, 7 equiv. to alkyne groups) were dissolved in 5 mL of anhydrous DMSO in a Schlenk tube. CuSO<sub>4</sub> (45 mg, 0.18 mmol, 4 equiv. to alkynes groups) was then added and the Schlenk tube was placed in an oil bath at 30 °C for 16 hours. The reaction medium was then dialyzed 4-5 days against milliQ water (Spectra/Por®6 MWCO 50 kDa membrane), containing EDTA the first 2 days, and lyophilized, then the reaction mixture was purified by ultrafiltration to remove all the unreacted dextran (yield = 369 mg, 85%).

<sup>1</sup>H-NMR (400 MHz, DMSO/TFA,  $\delta$ , ppm): 7.26 (s broad, benzyl), 5.05 (s broad, CH<sub>2</sub>-benzyl), 4.92 (s broad, C<sub>4</sub>OH), 4.84 (s broad, C<sub>3</sub>OH), 4.70 (s broad, C<sub>1</sub>H<sub>anom.</sub>), 4.55 (s, broad, NH-CH-CO), 4.49 (s broad, C<sub>2</sub>OH), 3.76 (s broad, C<sub>6</sub>H), 3.53 (s broad, C<sub>5</sub>H), 3.45 (s broad, C<sub>6</sub>H'), 3.22 (s broad, C<sub>2</sub>H + C<sub>4</sub>H), 2.55 (s broad, CH<sub>2</sub>-CH<sub>2</sub>-CO), 2-2.2 (m broad, CH-CH<sub>2</sub>-CH<sub>2</sub>). IR (cm<sup>-1</sup>): 3100-3600 (peak: 3300); 2920; 1730, 1650, 1545, 1200-1450 (multiple peaks)

### **Synthesis of glycopolypeptide 4':**

Tree-like 4', 80 units of benzyl-*L*-glutamate: Poly( $\gamma$ -benzyl-*L*-glutamate-*block*-*DL*-propargylglycine, copolymer 4) (181 mg, ca. 0.045 mmol of alkyne units),  $\alpha$ -azido-dextran (600 mg, 0.09 mmol, 2 equiv. to alkyne groups) and sodium ascorbate (63 mg, 0.32 mmol, 7 equiv. to alkyne groups) were dissolved in 5 mL of anhydrous DMSO in a Schlenk tube. CuSO<sub>4</sub> (45 mg, 0.18 mmol, 4 equiv. to alkynes groups) was then added and the Schlenk tube was placed in an oil bath at 30 °C for 16 hours. The reaction medium was then dialyzed 4-5 days against milliQ water (Spectra/Por®6 MWCO 50 kDa membrane), containing EDTA the first 2 days, and lyophilized, then the reaction mixture was purified by ultrafiltration to remove all the unreacted dextran (yield = 440 mg, 92%).

<sup>1</sup>H-NMR (400 MHz, DMSO,  $\delta$ , ppm): 7.26 (s broad, benzyl), 5.05 (s broad, CH<sub>2</sub>-benzyl), 4.92 (s broad, C<sub>4</sub>OH), 4.84 (s broad, C<sub>3</sub>OH), 4.70 (s broad, C<sub>1</sub>H<sub>anom.</sub>), 4.55 (s, broad, NH-CH-CO), 4.49 (s broad, C<sub>2</sub>OH), 3.76 (s broad, C<sub>6</sub>H), 3.53 (s broad, C<sub>5</sub>H), 3.45 (s broad, C<sub>6</sub>H'), 3.22 (s broad, C<sub>2</sub>H + C<sub>4</sub>H), 2.55 (s broad, CH<sub>2</sub>-CH<sub>2</sub>-CO), 2-2.2 (m broad, CH-CH<sub>2</sub>-CH<sub>2</sub>). IR (cm<sup>-1</sup>): 3100-3600 (peak: 3300); 2920; 1730, 1650, 1545, 1200-1450 (multiple peaks)

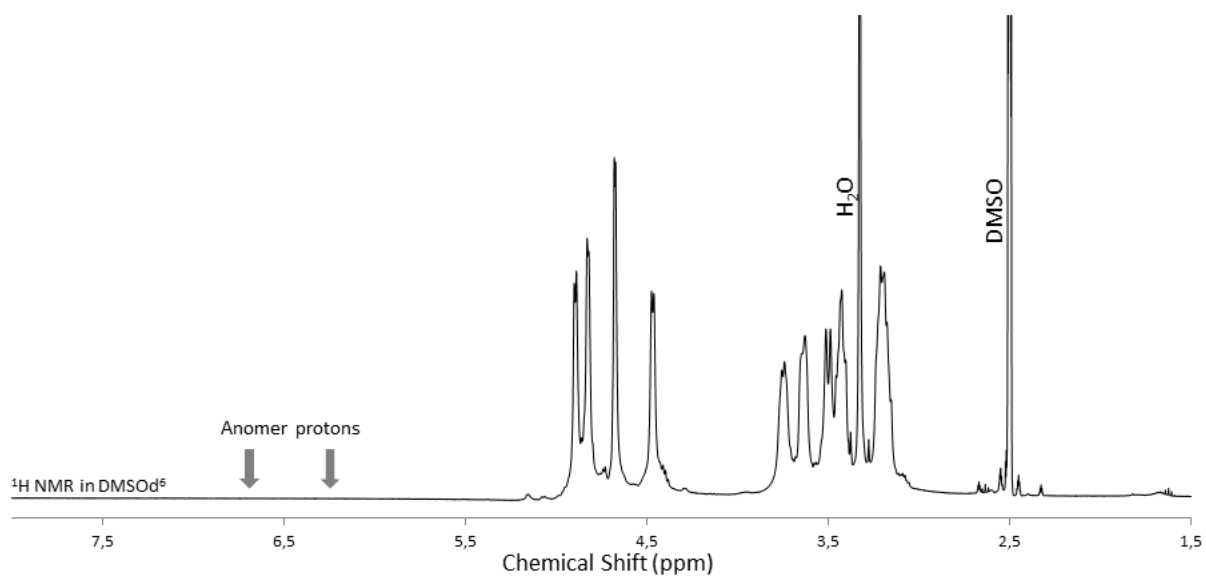

**Figure S1.**  $^1\text{H}$ NMR of azido-dextran after purification in  $\text{DMSO-d}_6$ .

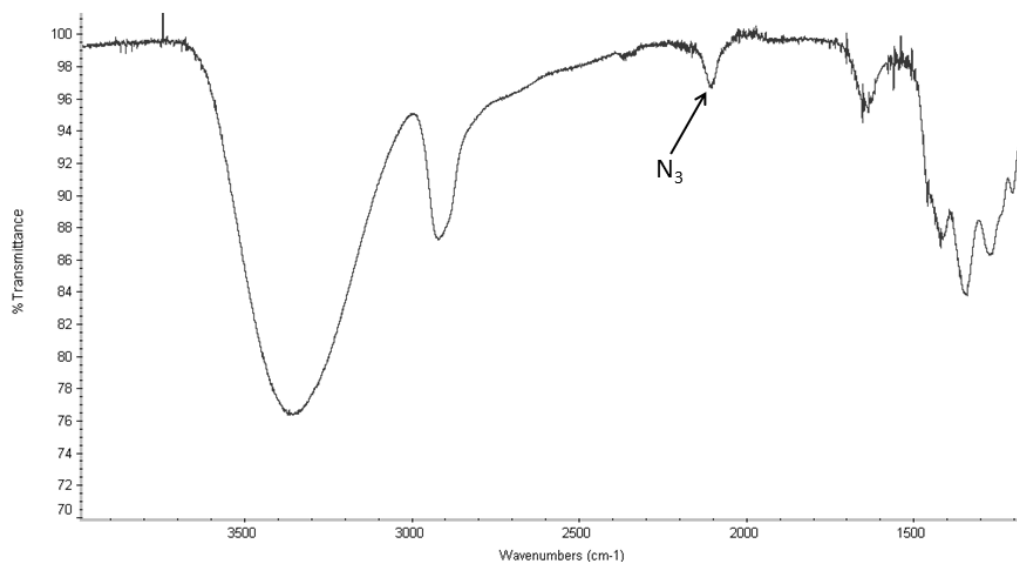

**Figure S2.** FTIR of azido-dextran after purification.

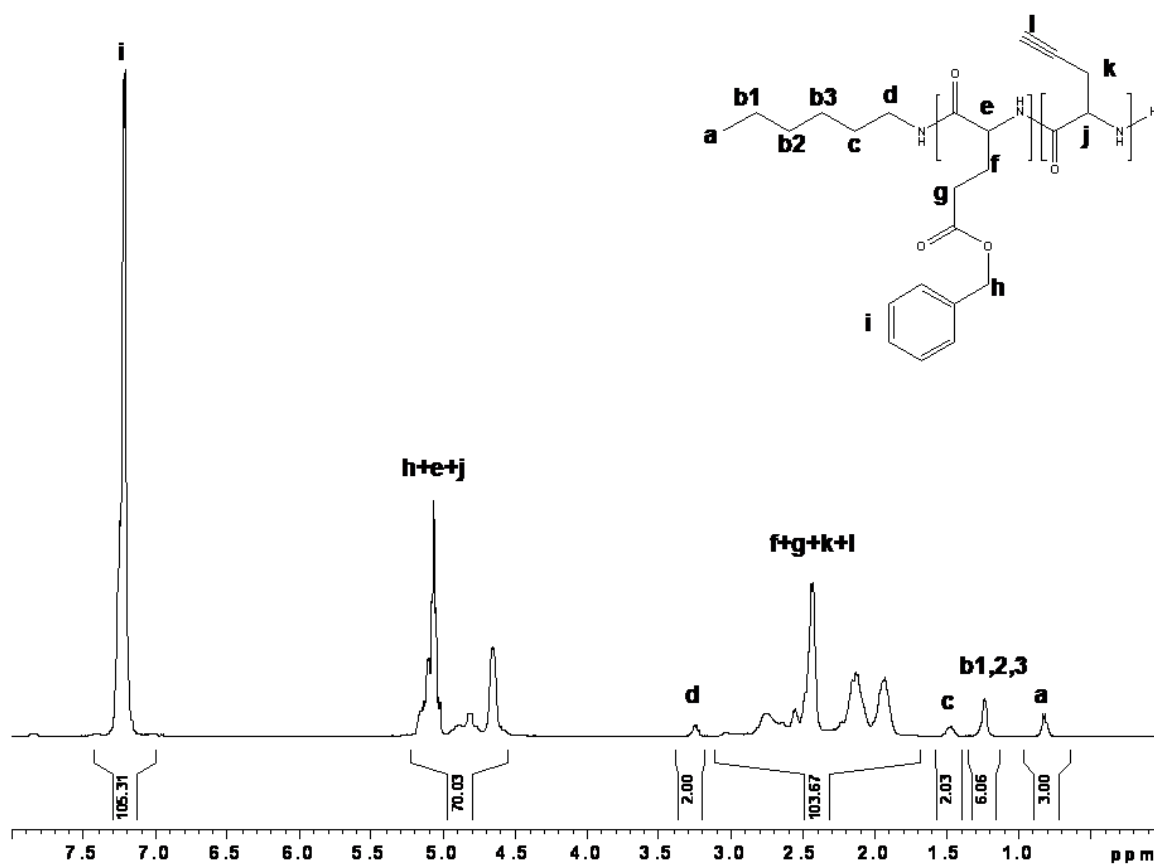

**Figure S3.** Typical  $^1\text{H NMR}$  of poly( $\gamma$ -benzyl-*L*-glutamate-*block*-DL-propargylglycine) (copolymer **1**) in  $\text{TFA-d}_6$

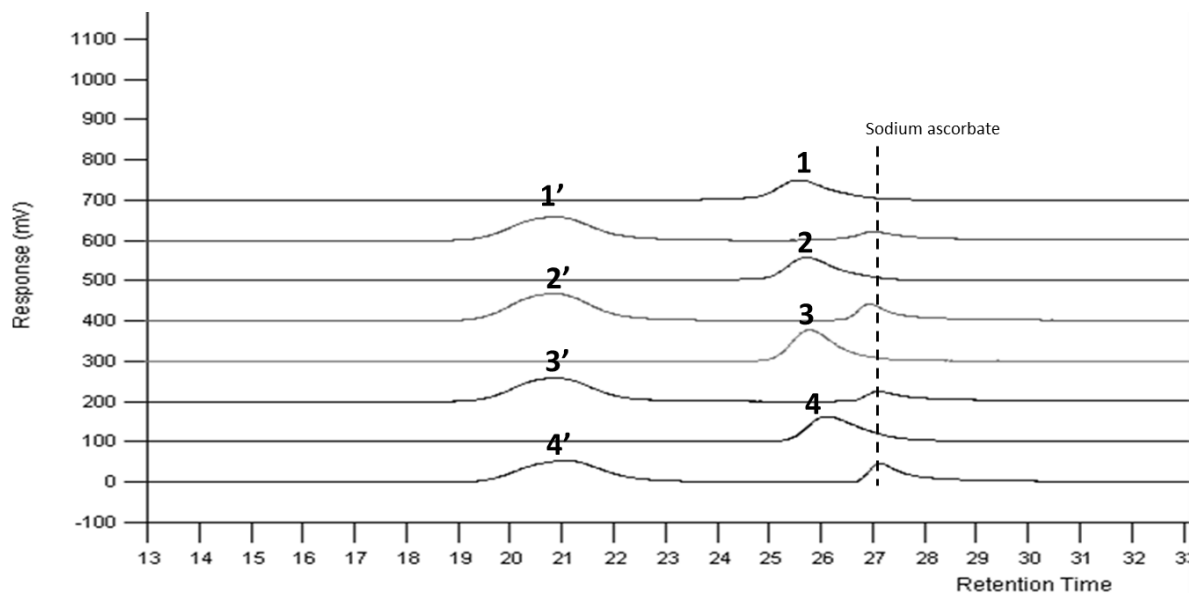

**Figure S4.** SEC traces of the copolypeptides **1'** to **4'** before and after CuAAc (elution in DMSO containing 1% LiBr, UV detection)

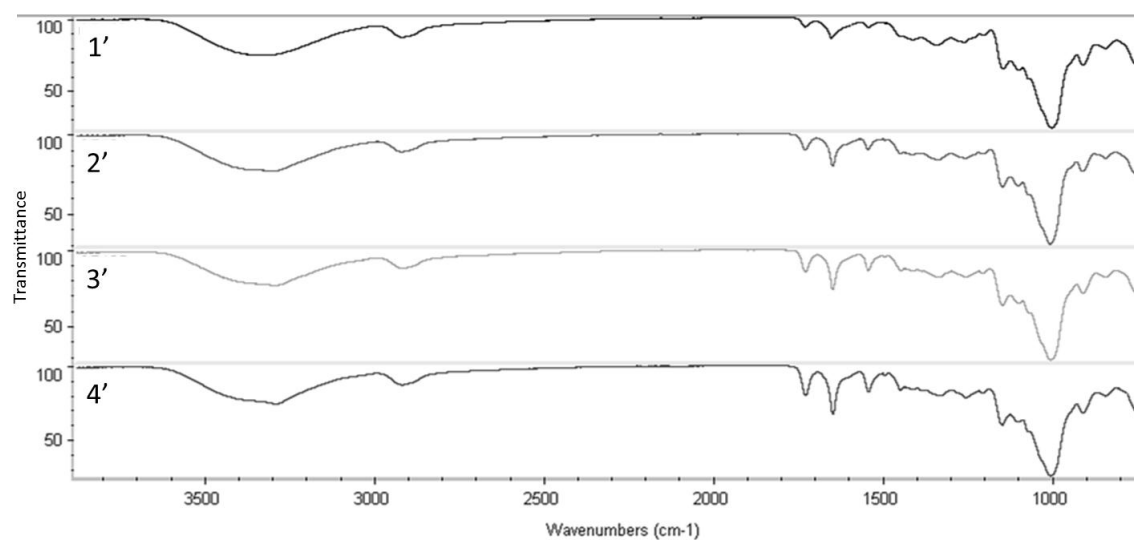

Figure S5. FTIR of glycopolypeptides 1' to 4'

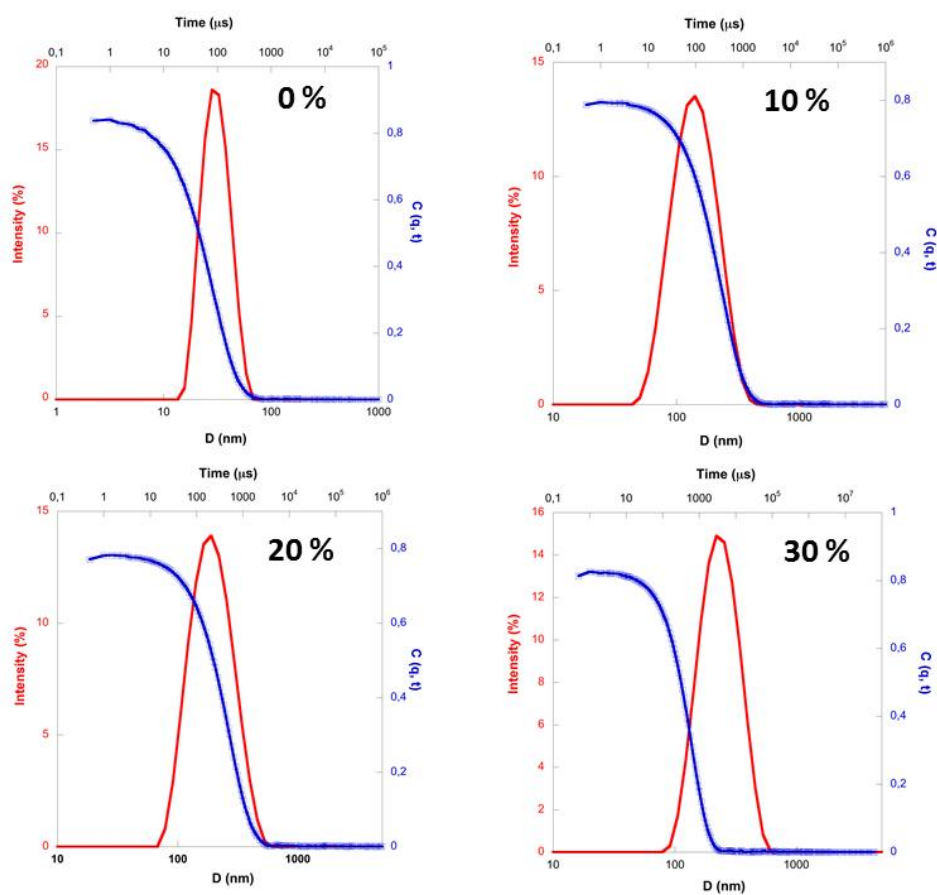

Figure S6 DLS measurements after self-assembly of blends including 3' and PBLG

| Glycopolypeptide | Volume taken by the polypeptide (nm <sup>3</sup> ) | Volume taken by the oligosaccharides (nm <sup>3</sup> ) | Total volume (nm <sup>3</sup> ) | <i>f</i> ratio |
|------------------|----------------------------------------------------|---------------------------------------------------------|---------------------------------|----------------|
| <b>1'</b>        | 6.7                                                | 54.9                                                    | 61.7                            | 0.89           |
| <b>2'</b>        | 13.0                                               | 54.9                                                    | 67.9                            | 0.81           |
| <b>3'</b>        | 16.7                                               | 54.9                                                    | 71.6                            | 0.77           |
| <b>4'</b>        | 20.3                                               | 54.9                                                    | 75.2                            | 0.73           |

**Table S1.** Volumes in nm<sup>3</sup> calculated for **1'** to **4'**: results were obtained from masses (DP from <sup>1</sup>HNMR) by taking densities value of 1.28 g.cm<sup>-3</sup> for PBLG and 0.98 g.cm<sup>-3</sup> for dextran.

| Blend                | Volume taken by the polypeptide (nm <sup>3</sup> ) | Volume taken by the oligosaccharides (nm <sup>3</sup> ) | Total volume (nm <sup>3</sup> ) | <i>f</i> ratio |
|----------------------|----------------------------------------------------|---------------------------------------------------------|---------------------------------|----------------|
| <b>3' alone</b>      | 16.7                                               | 54.9                                                    | 71.6                            | 0.77           |
| <b>3' + 10% PBLG</b> | 23.2                                               | 54.9                                                    | 78.1                            | 0.70           |
| <b>3' + 20% PBLG</b> | 31.4                                               | 54.9                                                    | 86.3                            | 0.64           |
| <b>3' + 30% PBLG</b> | 41.9                                               | 54.9                                                    | 96.8                            | 0.57           |

**Table S2.** Volumes in nm<sup>3</sup> calculated for the blends made from **3'**: results were obtained from masses by taking densities value of 1.28 g.cm<sup>-3</sup> for PBLG and 0.98 g.cm<sup>-3</sup> for dextran.
